# Supplementary material
Source: MDPI journal article supplement (https://www.mdpi.com/2673-9488/2/4/16)
Supplement: s1 [file s1]

Archive with 1 entries (1 files):
- physiologia-2069737-supplementary.pdf
